# Supplementary material for: “One stone two birds” design of borates featuring edge-sharing [BO4] and different B–O configurations in one structure utilizing covalent tetrahedra
Source: Royal Society of Chemistry journal article supplement (doi:10.1039/d4tc03050h), 2024-01-01
Supplement: d4tc03050h1.pdf [file d4tc03050h1.pdf]

## **“One Stone Two Birds” Design of Borates Featuring Edge-Sharing [BO<sub>4</sub>] and Different B-O Configuration in One Structure Utilizing Covalent Tetrahedra**

Haoran Wang,<sup>ab#</sup> Jiahao Jiao,<sup>ab#</sup> Abudukadi Tudi,<sup>a</sup> Shilie Pan,<sup>a\*</sup> Min Zhang<sup>a\*</sup>

<sup>a</sup> Research Center for Crystal Materials; State Key Laboratory of Functional Materials and Devices for Special Environmental Conditions, Xinjiang Key Laboratory of Functional Crystal Materials, Xinjiang Technical Institute of Physics and Chemistry, Chinese Academy of Science, Urumqi 830011, China.

<sup>b</sup> Center of Materials Science and Optoelectronics Engineering, University of Chinese Academy of Sciences, Beijing 100049, China.

<sup>#</sup>These authors contributed equally to this work.

\*Corresponding authors: slpan@ms.xjb.ac.cn, zhangmin@ms.xjb.ac.cn.

**Table S1** Crystal data and structure refinements for  $K_3Al_2B_{11}O_{21}$  and  $K_3Al_2MoB_9O_{21}$ .

|                                                               | $K_3Al_2B_{11}O_{21}$                                                                       | $K_3Al_2MoB_9O_{21}$                                                                                                                                                                    |
|---------------------------------------------------------------|---------------------------------------------------------------------------------------------|-----------------------------------------------------------------------------------------------------------------------------------------------------------------------------------------|
| Empirical formula                                             | $K_3Al_2B_{11}O_{21}$                                                                       | $K_3Al_2MoB_9O_{21}$                                                                                                                                                                    |
| Formula weight                                                | 626.17                                                                                      | 700.49                                                                                                                                                                                  |
| Temperature (K)                                               | 293(2)                                                                                      | 293(2)                                                                                                                                                                                  |
| Crystal system                                                | Monoclinic                                                                                  | Triclinic                                                                                                                                                                               |
| Space group                                                   | $P2_1/c$                                                                                    | $P\bar{1}$                                                                                                                                                                              |
| Unit cell dimensions                                          | $a = 6.9336(8) \text{ \AA}$<br>$b = 22.240(3) \text{ \AA}$<br>$c = 13.3521(12) \text{ \AA}$ | $a = 7.0548(11) \text{ \AA}$<br>$b = 11.9155(18) \text{ \AA}$<br>$c = 12.2046(18) \text{ \AA}$<br>$\alpha = 77.269(6)^\circ$<br>$\beta = 78.861(7)^\circ$<br>$\gamma = 89.456(6)^\circ$ |
| Volume ( $\text{\AA}^3$ )                                     | 1818.0(4)                                                                                   | 981.3(3)                                                                                                                                                                                |
| Z                                                             | 4                                                                                           | 2                                                                                                                                                                                       |
| Calculated density ( $\text{g}\cdot\text{cm}^{-3}$ )          | 2.288                                                                                       | 2.371                                                                                                                                                                                   |
| Absorption coefficient ( $\text{mm}^{-1}$ )                   | 0.960                                                                                       | 1.498                                                                                                                                                                                   |
| $F(000)$                                                      | 1224                                                                                        | 676                                                                                                                                                                                     |
| Crystal size ( $\text{mm}^3$ )                                | $0.13 \times 0.087 \times 0.08$                                                             | $0.271 \times 0.149 \times 0.102$                                                                                                                                                       |
| Theta range for data collection                               | 1.955 to 27.530 °                                                                           | 1.753 to 27.584 °                                                                                                                                                                       |
| Limiting indices                                              | $-9 \leq h \leq 9,$<br>$-28 \leq k \leq 26,$<br>$-16 \leq l \leq 17$                        | $-9 \leq h \leq 9$<br>$-15 \leq k \leq 15$<br>$-15 \leq l \leq 15$                                                                                                                      |
| Reflections collected / unique                                | 16212 / 4166<br>[ $R(\text{int}) = 0.0814$ ]                                                | 37235 / 4530<br>[ $R(\text{int}) = 0.0564$ ]                                                                                                                                            |
| Completeness                                                  | 99.9 %                                                                                      | 99.9 %                                                                                                                                                                                  |
| Data / restraints / parameters                                | 4166 / 0 / 334                                                                              | 4530 / 0 / 325                                                                                                                                                                          |
| Goodness-of-fit on $F^2$                                      | 0.975                                                                                       | 1.069                                                                                                                                                                                   |
| Final $R$ indices [ $F_o^2 > 2\sigma(F_o^2)$ ] <sup>[a]</sup> | $R_1 = 0.0488, wR_2 = 0.1086$                                                               | $R_1 = 0.0336, wR_2 = 0.0819$                                                                                                                                                           |
| $R$ indices (all data) <sup>[a]</sup>                         | $R_1 = 0.0882, wR_2 = 0.1278$                                                               | $R_1 = 0.0406, wR_2 = 0.0848$                                                                                                                                                           |
| Largest diff. peak and hole                                   | 0.672 and $-0.582 \text{ e}\cdot\text{\AA}^{-3}$                                            | 1.314 and $-0.718 \text{ e}\cdot\text{\AA}^{-3}$                                                                                                                                        |

$$^{[a]}R_1 = \frac{\sum ||F_o| - |F||}{\sum |F_o|} \text{ and } wR_2 = [\frac{\sum w(F_o^2 - F_c^2)^2}{\sum wF_o^4}]^{1/2}$$

**Table S2** Atomic coordinates ( $\times 10^4$ ), equivalent isotropic displacement parameters ( $\text{\AA}^2 \times 10^3$ ) and the bond valence sum (BVS) for  $\text{K}_3\text{Al}_2\text{B}_{11}\text{O}_{21}$  and  $\text{K}_3\text{Al}_2\text{MoB}_9\text{O}_{21}$

| Atoms                                             | $x$      | $y$      | $z$      | $U_{(\text{eq})}$ | BVS  |
|---------------------------------------------------|----------|----------|----------|-------------------|------|
| $\text{K}_3\text{Al}_2\text{B}_{11}\text{O}_{21}$ |          |          |          |                   |      |
| K(1)                                              | 6219(1)  | -1070(1) | 7519(1)  | 33(1)             | 1.03 |
| K(2)                                              | -3865(1) | -723(1)  | 2502(1)  | 33(1)             | 1.29 |
| K(3)                                              | -7161(2) | -2282(1) | 1158(1)  | 43(1)             | 0.79 |
| Al(1)                                             | 959(2)   | 924(1)   | 9079(1)  | 18(1)             | 2.94 |
| Al(2)                                             | -879(2)  | -919(1)  | 5868(1)  | 20(1)             | 2.87 |
| B(1)                                              | 1876(7)  | -814(2)  | 9977(4)  | 21(1)             | 3.05 |
| B(2)                                              | 4704(6)  | -657(2)  | 9435(3)  | 18(1)             | 3.04 |
| B(3)                                              | 997(6)   | -331(2)  | 8180(4)  | 19(1)             | 3.06 |
| B(4)                                              | -1141(6) | 254(2)   | 6855(4)  | 20(1)             | 3.06 |
| B(5)                                              | -4821(6) | 600(2)   | 5593(4)  | 20(1)             | 3.06 |
| B(6)                                              | -2003(6) | 736(2)   | 5036(4)  | 20(1)             | 3.07 |
| B(7)                                              | -2356(7) | -2027(2) | 5307(4)  | 24(1)             | 3.03 |
| B(8)                                              | -5082(7) | -2725(2) | 4108(4)  | 24(1)             | 3.03 |
| B(9)                                              | -2140(7) | -2471(2) | 3637(4)  | 22(1)             | 3.04 |
| B(10)                                             | -1203(7) | -1948(2) | 2280(4)  | 23(1)             | 3.06 |
| B(11)                                             | 1036(7)  | -2751(2) | 3415(4)  | 23(1)             | 3.06 |
| O(1)                                              | 1364(4)  | -1023(1) | 10768(2) | 23(1)             | 2.00 |
| O(2)                                              | 4074(4)  | -797(1)  | 10249(2) | 23(1)             | 2.15 |
| O(3)                                              | 6799(4)  | -715(1)  | 9667(2)  | 23(1)             | 1.98 |
| O(4)                                              | 366(4)   | -609(1)  | 8944(2)  | 23(1)             | 2.06 |
| O(5)                                              | 3182(4)  | -447(1)  | 8395(2)  | 22(1)             | 2.01 |
| O(6)                                              | 503(4)   | 347(1)   | 8069(2)  | 21(1)             | 2.13 |
| O(7)                                              | -663(4)  | -429(1)  | 6965(2)  | 20(1)             | 2.09 |
| O(8)                                              | -3322(4) | 384(1)   | 6628(2)  | 22(1)             | 2.04 |
| O(9)                                              | -508(4)  | 527(1)   | 6088(2)  | 23(1)             | 2.03 |
| O(10)                                             | -6927(4) | 648(1)   | 5357(2)  | 25(1)             | 2.04 |

|                                  |          |          |         |       |      |
|----------------------------------|----------|----------|---------|-------|------|
| O(11)                            | -4184(4) | 764(1)   | 4797(2) | 26(1) | 2.08 |
| O(12)                            | -1505(4) | 910(1)   | 4239(2) | 25(1) | 1.99 |
| O(13)                            | -1629(4) | -1618(1) | 6148(2) | 27(1) | 1.88 |
| O(14)                            | -4283(4) | -2346(1) | 5018(2) | 29(1) | 2.02 |
| O(15)                            | -1275(4) | -2128(1) | 4696(2) | 29(1) | 1.93 |
| O(16)                            | -4149(4) | -2794(1) | 3429(2) | 26(1) | 2.06 |
| O(17)                            | -2653(4) | -2057(1) | 2682(2) | 25(1) | 1.99 |
| O(18)                            | -455(4)  | -2910(1) | 3746(2) | 26(1) | 1.99 |
| O(19)                            | -1560(4) | -1531(1) | 1496(2) | 29(1) | 1.99 |
| O(20)                            | 730(4)   | -2279(1) | 2695(2) | 28(1) | 2.03 |
| O(21)                            | 3018(4)  | -3038(1) | 3882(2) | 29(1) | 2.00 |
| <hr/> $K_3Al_2MoB_9O_{21}$ <hr/> |          |          |         |       |      |
| K(1)                             | 1674(1)  | 10146(1) | 8395(1) | 31(1) | 1.04 |
| K(2)                             | 6611(1)  | 5052(1)  | 8474(1) | 25(1) | 1.21 |
| K(3)                             | -2506(1) | 849(1)   | 5666(1) | 41(1) | 1.17 |
| Al(1)                            | 1651(1)  | 6633(1)  | 8043(1) | 14(1) | 2.90 |
| Al(2)                            | 3310(1)  | 8114(1)  | 1521(1) | 16(1) | 2.91 |
| Mo(1)                            | 3141(1)  | 1961(1)  | 4868(1) | 33(1) | 6.13 |
| B(1)                             | 6104(4)  | 9547(2)  | 8420(3) | 18(1) | 3.05 |
| B(2)                             | 5189(4)  | 7633(2)  | 8298(3) | 18(1) | 3.04 |
| B(3)                             | 8590(4)  | 8188(2)  | 8051(3) | 19(1) | 3.04 |
| B(4)                             | 2130(5)  | 5861(3)  | 5853(3) | 25(1) | 3.10 |
| B(5)                             | 2766(5)  | 4619(3)  | 4526(3) | 28(1) | 3.08 |
| B(6)                             | 2488(5)  | 6644(3)  | 3805(3) | 27(1) | 3.07 |
| B(7)                             | 40(4)    | 7523(2)  | 812(3)  | 17(1) | 3.04 |
| B(8)                             | -3223(4) | 6964(2)  | 783(3)  | 16(1) | 3.05 |
| B(9)                             | -596(4)  | 5670(2)  | 405(3)  | 15(1) | 3.04 |
| O(1)                             | 5551(3)  | 10570(2) | 8588(2) | 23(1) | 2.02 |
| O(2)                             | 4715(2)  | 8710(2)  | 8486(2) | 22(1) | 2.14 |

---

|       |          |         |         |       |      |
|-------|----------|---------|---------|-------|------|
| O(3)  | 3917(2)  | 6812(2) | 8328(2) | 21(1) | 2.05 |
| O(4)  | 8042(2)  | 9302(2) | 8115(2) | 23(1) | 2.07 |
| O(5)  | 7152(2)  | 7386(2) | 8101(2) | 23(1) | 2.09 |
| O(6)  | 10429(2) | 7916(2) | 7990(2) | 22(1) | 1.95 |
| O(7)  | 1787(3)  | 6001(2) | 6907(2) | 32(1) | 1.98 |
| O(8)  | 2460(4)  | 4773(2) | 5617(2) | 35(1) | 1.96 |
| O(9)  | 2190(4)  | 6769(2) | 4926(2) | 36(1) | 2.13 |
| O(10) | 2498(3)  | 7558(2) | 2970(2) | 33(1) | 2.07 |
| O(11) | 2765(3)  | 5540(2) | 3619(2) | 30(1) | 2.12 |
| O(12) | 3077(4)  | 3574(2) | 4283(2) | 42(1) | 2.12 |
| O(13) | 3366(5)  | 1625(3) | 6261(3) | 69(1) | 1.99 |
| O(14) | 1143(4)  | 1251(2) | 4702(3) | 67(1) | 2.12 |
| O(15) | 5078(4)  | 1400(2) | 4109(2) | 47(1) | 1.93 |
| O(16) | 1258(2)  | 8340(2) | 902(2)  | 21(1) | 1.97 |
| O(17) | -1865(2) | 7804(2) | 774(2)  | 22(1) | 2.05 |
| O(18) | 594(2)   | 6427(2) | 760(2)  | 18(1) | 2.03 |
| O(19) | -225(2)  | 4420(1) | 833(2)  | 15(1) | 2.08 |
| O(20) | -2610(2) | 5916(2) | 584(2)  | 17(1) | 2.01 |
| O(21) | -5104(2) | 7172(2) | 954(2)  | 21(1) | 2.03 |

---

**Table S3** Selected bond lengths (Å) and angles (°) for  $K_3Al_2B_{11}O_{21}$ .

---

|               |          |              |          |
|---------------|----------|--------------|----------|
| K(1)-O(3)     | 2.816(3) | B(1)-O(1)    | 1.346(5) |
| K(1)-O(4)#1   | 2.793(3) | B(1)-O(2)    | 1.391(5) |
| K(1)-O(5)     | 3.167(3) | B(1)-O(4)    | 1.359(5) |
| K(1)-O(7)#1   | 2.958(3) | B(2)-O(2)    | 1.384(5) |
| K(1)-O(11)#2  | 2.814(3) | B(2)-O(3)    | 1.342(4) |
| K(1)-O(12)#2  | 3.019(3) | B(2)-O(5)    | 1.372(4) |
| K(1)-O(13)#1  | 3.104(3) | B(3)-O(4)    | 1.427(5) |
| K(1)-O(16)#3  | 2.867(3) | B(3)-O(5)    | 1.427(5) |
| K(1)-O(18)#3  | 3.100(3) | B(3)-O(6)    | 1.537(5) |
| K(2)-O(1)#4   | 3.092(3) | B(3)-O(7)    | 1.501(5) |
| K(2)-O(2)#4   | 2.661(3) | B(4)-O(6)    | 1.495(5) |
| K(2)-O(5)#2   | 2.994(3) | B(4)-O(7)    | 1.547(5) |
| K(2)-O(6)#2   | 2.896(3) | B(4)-O(8)    | 1.425(4) |
| K(2)-O(8)#5   | 2.802(3) | B(4)-O(9)    | 1.426(5) |
| K(2)-O(9)#2   | 2.751(2) | B(5)-O(8)    | 1.369(5) |
| K(2)-O(10)#5  | 2.651(3) | B(5)-O(10)   | 1.346(5) |
| K(2)-O(17)    | 3.060(3) | B(5)-O(11)   | 1.378(5) |
| K(2)-O(19)    | 3.098(3) | B(6)-O(9)    | 1.377(5) |
| K(3)-O(1)#4   | 2.942(3) | B(6)-O(11)   | 1.393(5) |
| K(3)-O(14)#7  | 3.136(3) | B(6)-O(12)   | 1.322(5) |
| K(3)-O(15)#6  | 2.906(3) | B(7)-O(13)   | 1.346(5) |
| K(3)-O(16)    | 2.985(3) | B(7)-O(14)   | 1.398(5) |
| K(3)-O(17)    | 2.862(3) | B(7)-O(15)   | 1.360(5) |
| K(3)-O(18)#6  | 2.978(3) | B(8)-O(14)   | 1.364(5) |
| K(3)-O(20)#8  | 3.028(3) | B(8)-O(16)   | 1.346(5) |
| K(3)-O(21)#6  | 3.179(3) | B(8)-O(21)#8 | 1.392(5) |
|               |          | B(9)-O(15)   | 1.465(5) |
| Al(1)-O(1)#9  | 1.730(3) | B(9)-O(16)   | 1.473(5) |
| Al(1)-O(3)#10 | 1.730(3) | B(9)-O(17)   | 1.474(5) |

---

---

|                       |            |                    |          |
|-----------------------|------------|--------------------|----------|
| Al(1)-O(6)            | 1.780(3)   | B(9)-O(18)         | 1.476(5) |
| Al(1)-O(19)#2         | 1.698(3)   | B(10)-O(17)        | 1.366(5) |
| Al(2)-O(7)            | 1.774(3)   | B(10)-O(19)        | 1.333(5) |
| Al(2)-O(10)#5         | 1.738(3)   | B(10)-O(20)        | 1.395(5) |
| Al(2)-O(12)#2         | 1.725(3)   | B(11)-O(18)        | 1.349(5) |
| Al(2)-O(13)           | 1.734(3)   | B(11)-O(20)        | 1.370(5) |
|                       |            | B(11)-O(21)        | 1.371(5) |
| O(1)#9-Al(1)-O(6)     | 109.73(13) | O(8)-B(5)-O(11)    | 120.4(3) |
| O(3)#10-Al(1)-O(1)#9  | 112.55(14) | O(10)-B(5)-O(8)    | 119.4(4) |
| O(3)#10-Al(1)-O(6)    | 107.39(13) | O(10)-B(5)-O(11)   | 120.2(3) |
| O(19)#2-Al(1)-O(1)#9  | 113.08(14) | O(9)-B(6)-O(11)    | 117.7(4) |
| O(19)#2-Al(1)-O(3)#10 | 110.55(14) | O(12)-B(6)-O(9)    | 124.3(4) |
| O(19)#2-Al(1)-O(6)    | 102.97(14) | O(12)-B(6)-O(11)   | 117.9(3) |
| O(10)#5-Al(2)-O(7)    | 105.13(13) | O(13)-B(7)-O(14)   | 120.6(4) |
| O(12)#2-Al(2)-O(7)    | 110.38(13) | O(13)-B(7)-O(15)   | 121.0(4) |
| O(12)#2-Al(2)-O(10)#5 | 111.55(14) | O(15)-B(7)-O(14)   | 118.4(4) |
| O(12)#2-Al(2)-O(13)   | 115.08(14) | O(14)-B(8)-O(21)#8 | 116.7(4) |
| O(13)-Al(2)-O(7)      | 106.92(14) | O(16)-B(8)-O(14)   | 123.2(4) |
| O(13)-Al(2)-O(10)#5   | 107.20(13) | O(16)-B(8)-O(21)#8 | 120.2(4) |
| O(1)-B(1)-O(2)        | 117.7(3)   | O(15)-B(9)-O(16)   | 111.0(3) |
| O(1)-B(1)-O(4)        | 123.4(4)   | O(15)-B(9)-O(17)   | 109.4(3) |
| O(4)-B(1)-O(2)        | 119.0(4)   | O(15)-B(9)-O(18)   | 107.6(3) |
| O(3)-B(2)-O(2)        | 120.2(3)   | O(16)-B(9)-O(17)   | 108.6(3) |
| O(3)-B(2)-O(5)        | 120.1(4)   | O(16)-B(9)-O(18)   | 109.3(3) |
| O(5)-B(2)-O(2)        | 119.7(3)   | O(17)-B(9)-O(18)   | 110.9(3) |
| O(4)-B(3)-O(6)        | 111.4(3)   | O(17)-B(10)-O(20)  | 119.9(4) |
| O(4)-B(3)-O(7)        | 111.9(3)   | O(19)-B(10)-O(17)  | 122.2(4) |
| O(5)-B(3)-O(4)        | 115.5(3)   | O(19)-B(10)-O(20)  | 117.9(4) |

---

---

|                |          |                   |          |
|----------------|----------|-------------------|----------|
| O(5)-B(3)-O(6) | 111.4(3) | O(18)-B(11)-O(20) | 122.7(3) |
| O(5)-B(3)-O(7) | 113.2(3) | O(18)-B(11)-O(21) | 119.2(4) |
| O(7)-B(3)-O(6) | 90.9(2)  | O(20)-B(11)-O(21) | 117.9(4) |
| O(6)-B(4)-O(7) | 90.7(2)  |                   |          |
| O(8)-B(4)-O(6) | 113.3(3) |                   |          |
| O(8)-B(4)-O(7) | 112.2(3) |                   |          |
| O(8)-B(4)-O(9) | 114.5(3) |                   |          |
| O(9)-B(4)-O(6) | 112.6(3) |                   |          |
| O(9)-B(4)-O(7) | 111.3(3) |                   |          |

---

Symmetry transformations used to generate equivalent atoms:

|                     |                         |                         |                        |
|---------------------|-------------------------|-------------------------|------------------------|
| #1 $x+1, y, z$      | #2 $-x, -y, -z+1$       | #3 $x+1, -y-1/2, z+1/2$ | #4 $x-1, y, z-1$       |
| #5 $-x-1, -y, -z+1$ | #6 $x-1, -y-1/2, z-1/2$ | #7 $x, -y-1/2, z-1/2$   | #8 $x-1, y, z$         |
| #9 $-x, -y, -z+2$   | #10 $-x+1, -y, -z+2$    | #11 $x+1, y, z+1$       | #12 $x, -y-1/2, z+1/2$ |

---



**Table S4** Selected bond lengths (Å) and angles (°) for  $K_3Al_2MoB_9O_{21}$ .

---

|              |            |             |          |
|--------------|------------|-------------|----------|
| K(1)-O(1)    | 2.8489(19) | Mo(1)-O(12) | 1.901(2) |
| K(1)-O(2)    | 2.7344(19) | Mo(1)-O(13) | 1.697(3) |
| K(1)-O(4)#2  | 2.8693(19) | Mo(1)-O(14) | 1.718(3) |
| K(1)-O(6)#2  | 2.9782(19) | Mo(1)-O(15) | 1.714(3) |
| K(1)-O(13)#4 | 2.852(3)   |             |          |
| K(1)-O(16)#3 | 2.8628(19) | B(1)-O(1)   | 1.322(3) |
| K(1)-O(16)#5 | 3.293(2)   | B(1)-O(2)   | 1.383(3) |
| K(1)-O(17)#3 | 2.8576(19) | B(1)-O(4)   | 1.392(3) |
| K(2)-O(3)    | 2.8161(18) | B(2)-O(2)   | 1.380(3) |
| K(2)-O(5)    | 2.7355(19) | B(2)-O(3)   | 1.324(3) |
| K(2)-O(11)#7 | 2.751(2)   | B(2)-O(5)   | 1.398(3) |
| K(2)-O(12)#7 | 3.368(3)   | B(3)-O(4)   | 1.393(3) |
| K(2)-O(18)#7 | 2.7911(18) | B(3)-O(5)   | 1.384(3) |
| K(2)-O(19)#7 | 2.9513(18) | B(3)-O(6)   | 1.326(3) |
| K(2)-O(20)#6 | 2.9735(18) | B(4)-O(7)   | 1.309(4) |
| K(2)-O(20)#8 | 3.1175(19) | B(4)-O(8)   | 1.396(4) |
| K(2)-O(21)#6 | 2.7560(19) | B(4)-O(9)   | 1.377(4) |
| K(3)-O(4)#10 | 3.238(2)   | B(5)-O(8)   | 1.360(4) |
| K(3)-O(9)#6  | 2.770(2)   | B(5)-O(11)  | 1.376(4) |
| K(3)-O(10)#6 | 2.787(2)   | B(5)-O(12)  | 1.348(4) |
| K(3)-O(13)#2 | 3.048(4)   | B(6)-O(9)   | 1.385(4) |
| K(3)-O(14)   | 2.616(3)   | B(6)-O(10)  | 1.317(4) |
| K(3)-O(14)#9 | 2.769(3)   | B(6)-O(11)  | 1.389(4) |
| K(3)-O(15)#9 | 3.183(3)   | B(7)-O(16)  | 1.341(3) |
| K(3)-O(15)#2 | 2.763(3)   | B(7)-O(17)  | 1.389(3) |
|              |            | B(7)-O(18)  | 1.370(3) |
| Al(1)-O(3)   | 1.7250(19) | B(8)-O(17)  | 1.389(3) |
| Al(1)-O(6)#2 | 1.7424(19) | B(8)-O(20)  | 1.375(3) |
| Al(1)-O(7)   | 1.705(2)   | B(8)-O(21)  | 1.333(3) |

---

---

|                        |            |                     |           |
|------------------------|------------|---------------------|-----------|
| Al(1)-O(19)#6          | 1.7889(19) | B(9)-O(18)          | 1.426(3)  |
| Al(2)-O(1)#11          | 1.7365(19) | B(9)-O(19)#13       | 1.537(3)  |
| Al(2)-O(10)            | 1.730(2)   | B(9)-O(19)          | 1.505(3)  |
| Al(2)-O(16)            | 1.7501(19) | B(9)-O(20)          | 1.433(3)  |
| Al(2)-O(21)#12         | 1.7347(19) |                     |           |
| O(3)-Al(1)-O(6)#2      | 109.78(9)  | O(5)-B(3)-O(4)      | 117.8(2)  |
| O(3)-Al(1)-O(19)#6     | 110.79(9)  | O(6)-B(3)-O(4)      | 120.0(2)  |
| O(6)#2-Al(1)-O(19)#6   | 106.39(9)  | O(6)-B(3)-O(5)      | 122.2(2)  |
| O(7)-Al(1)-O(3)        | 110.81(11) | O(7)-B(4)-O(8)      | 121.2(3)  |
| O(7)-Al(1)-O(6)#2      | 117.30(11) | O(7)-B(4)-O(9)      | 122.1(3)  |
| O(7)-Al(1)-O(19)#6     | 101.30(10) | O(9)-B(4)-O(8)      | 116.7(3)  |
| O(1)#11-Al(2)-O(16)    | 109.41(9)  | O(8)-B(5)-O(11)     | 120.6(3)  |
| O(10)-Al(2)-O(1)#11    | 105.98(11) | O(12)-B(5)-O(8)     | 122.1(3)  |
| O(10)-Al(2)-O(16)      | 106.76(11) | O(12)-B(5)-O(11)    | 117.3(3)  |
| O(10)-Al(2)-O(21)#12   | 109.44(11) | O(9)-B(6)-O(11)     | 117.5(3)  |
| O(21)#12-Al(2)-O(1)#11 | 111.48(9)  | O(10)-B(6)-O(9)     | 119.5(3)  |
| O(21)#12-Al(2)-O(16)   | 113.39(9)  | O(10)-B(6)-O(11)    | 122.9(3)  |
|                        |            | O(16)-B(7)-O(17)    | 118.2(2)  |
| O(13)-Mo(1)-O(12)      | 112.59(13) | O(16)-B(7)-O(18)    | 122.8(2)  |
| O(13)-Mo(1)-O(14)      | 109.93(18) | O(18)-B(7)-O(17)    | 118.9(2)  |
| O(13)-Mo(1)-O(15)      | 106.90(15) | O(20)-B(8)-O(17)    | 119.4(2)  |
| O(14)-Mo(1)-O(12)      | 111.58(13) | O(21)-B(8)-O(17)    | 120.9(2)  |
| O(15)-Mo(1)-O(12)      | 110.24(12) | O(21)-B(8)-O(20)    | 119.7(2)  |
| O(15)-Mo(1)-O(14)      | 105.25(14) | O(18)-B(9)-O(19)#13 | 110.5(2)  |
|                        |            | O(18)-B(9)-O(19)    | 113.0(2)  |
| O(1)-B(1)-O(2)         | 119.2(2)   | O(18)-B(9)-O(20)    | 114.8(2)  |
| O(1)-B(1)-O(4)         | 122.2(2)   | O(19)-B(9)-O(19)#13 | 90.49(18) |
| O(2)-B(1)-O(4)         | 118.6(2)   | O(20)-B(9)-O(19)#13 | 112.6(2)  |

---

---

|                |          |                  |          |
|----------------|----------|------------------|----------|
| O(2)-B(2)-O(5) | 117.3(2) | O(20)-B(9)-O(19) | 113.0(2) |
| O(3)-B(2)-O(2) | 124.5(2) |                  |          |
| O(3)-B(2)-O(5) | 118.1(2) |                  |          |

---

Symmetry transformations used to generate equivalent atoms:

|                   |                   |                      |                |
|-------------------|-------------------|----------------------|----------------|
| #1 -x, -y+2, -z+2 | #2 x-1, y, z      | #3 -x, -y+2, -z+1    | #4 x, y+1, z   |
| #5 x, y, z+1      | #6 -x, -y+1, -z+1 | #7 -x+1, -y+1, -z+1  | #8 x+1, y, z+1 |
| #9 -x, -y, -z+1   | #10 x-1, y-1, z   | #11 -x+1, -y+2, -z+1 | #12 x+1, y, z  |
| #13 -x, -y+1, -z  | #14 x+1, y+1, z   | #15 x-1, y, z-1      | #16 x, y-1, z  |
| #17 x, y, z-1     |                   |                      |                |

---

**Table S5** Borates with edge-sharing [BO<sub>4</sub>] tetrahedral structure. The compounds highlighted in red are the ones presented in this study.

| Compound                                                                                                                         | Space Group                  | FBB                                                               | B-O Anionic Framework                                                               | A : B <sup>a</sup> | Covalent Tetrahedron | Synthesized Condition      | References |
|----------------------------------------------------------------------------------------------------------------------------------|------------------------------|-------------------------------------------------------------------|-------------------------------------------------------------------------------------|--------------------|----------------------|----------------------------|------------|
| High Pressure                                                                                                                    |                              |                                                                   |                                                                                     |                    |                      |                            |            |
| RE <sub>4</sub> B <sub>6</sub> O <sub>15</sub> (RE = Dy, Ho)                                                                     | <i>C2/c</i>                  | B <sub>6</sub> O <sub>18</sub>                                    | 2D Monolayer                                                                        | 0.67               | /                    | 8.0 Gpa, 1000 °C           | [1]        |
| $\alpha$ -RE <sub>2</sub> B <sub>4</sub> O <sub>9</sub> (RE = Eu, Gd, Tb, Dy, Sm, Ho, Y)                                         | <i>C2/c</i>                  | B <sub>20</sub> O <sub>50</sub>                                   | 3D Network                                                                          | 0.50               | /                    | 7.5-12.3 Gpa, 1020-1150 °C | [2]        |
| La <sub>3</sub> B <sub>6</sub> O <sub>13</sub> (OH)                                                                              | <i>P2<sub>1</sub></i>        | B <sub>12</sub> O <sub>32</sub> (OH) <sub>2</sub>                 | 2D Monolayer                                                                        | 0.50               | /                    | 6.0 GPa, 1400 °C           | [3]        |
| HP-MB <sub>2</sub> O <sub>4</sub> (M = Ni, Fe, Co)                                                                               | <i>C2/c</i>                  | B <sub>2</sub> O <sub>6</sub>                                     | 2D Monolayer                                                                        | 0.50               | /                    | 6.5-8.0 GPa, 680-1030 °C   | [4]        |
| $\gamma$ -HfB <sub>2</sub> O <sub>5</sub>                                                                                        | <i>P2<sub>1</sub>/c</i>      | B <sub>4</sub> O <sub>12</sub>                                    | 2D Monolayer                                                                        | 0.50               | /                    | 114 GPa                    | [5]        |
| M <sub>6</sub> B <sub>22</sub> O <sub>39</sub> ·H <sub>2</sub> O (M = Fe, Co)                                                    | <i>Pmn2<sub>1</sub></i>      | B <sub>11</sub> O <sub>34</sub>                                   | 3D Network                                                                          | 0.27               | /                    | 6.0 GPa, 880 °C            | [6]        |
| Co <sub>7</sub> B <sub>24</sub> O <sub>42</sub> (OH) <sub>2</sub> ·2H <sub>2</sub> O                                             | <i>Pbam</i>                  | B <sub>12</sub> O <sub>32</sub> (OH) <sub>2</sub>                 | 3D Network                                                                          | 0.29               | /                    | 6.0 GPa, 880 °C            | [7]        |
| HP-AB <sub>3</sub> O <sub>5</sub> (A = K, NH <sub>4</sub> , Rb, Tl, Cs <sub>1-x</sub> (H <sub>3</sub> O) <sub>x</sub> )          | <i>C2/c</i>                  | B <sub>6</sub> O <sub>14</sub>                                    | 3D Network                                                                          | 0.33               | /                    | 3.0-6.0 GPa, 600-1400 °C   | [8]        |
| HP-CsB <sub>5</sub> O <sub>8</sub>                                                                                               | <i>Pnma</i>                  | B <sub>5</sub> O <sub>11</sub>                                    | 3D Network                                                                          | 0.20               | /                    | 6.0 GPa, 900 °C            | [9]        |
| NaBSi <sub>3</sub> O <sub>8</sub>                                                                                                | <i>P<math>\bar{1}</math></i> | B <sub>2</sub> O <sub>6</sub>                                     | 0D Isolated [B <sub>2</sub> O <sub>6</sub> ]                                        | 1.00               | /                    | 27.8 GPa                   | [10]       |
| $\gamma$ -BaB <sub>2</sub> O <sub>4</sub>                                                                                        | <i>P2<sub>1</sub>/n</i>      | B <sub>8</sub> O <sub>18</sub>                                    | 0D Isolated [B <sub>8</sub> O <sub>18</sub> ]                                       | 0.50               | /                    | 3.0 GPa, 900 °C            | [11]       |
| $\alpha$ -Ba <sub>3</sub> [B <sub>10</sub> O <sub>17</sub> (OH) <sub>2</sub> ]                                                   | <i>P2<sub>1</sub>/n</i>      | B <sub>20</sub> O <sub>42</sub> (OH) <sub>4</sub>                 | 3D Network                                                                          | 0.30               | /                    | 1.0 GPa 500°C              | [12]       |
| Atmosphere Pressure                                                                                                              |                              |                                                                   |                                                                                     |                    |                      |                            |            |
| KZnB <sub>3</sub> O <sub>6</sub>                                                                                                 | <i>P<math>\bar{1}</math></i> | B <sub>6</sub> O <sub>12</sub>                                    | 0D Isolated [B <sub>6</sub> O <sub>12</sub> ]                                       | 0.67               | [ZnO <sub>4</sub> ]  | 750 °C                     | [13]       |
| Ba <sub>4</sub> Na <sub>2</sub> Zn <sub>4</sub> (B <sub>3</sub> O <sub>6</sub> ) <sub>2</sub> (B <sub>12</sub> O <sub>24</sub> ) | <i>P<math>\bar{1}</math></i> | B <sub>3</sub> O <sub>6</sub> and B <sub>12</sub> O <sub>24</sub> | 0D Isolated [B <sub>3</sub> O <sub>6</sub> ] and [B <sub>12</sub> O <sub>24</sub> ] | 0.56               | [ZnO <sub>4</sub> ]  | 750 °C                     | [14]       |
| Li <sub>4</sub> Na <sub>2</sub> CsB <sub>7</sub> O <sub>20</sub>                                                                 | <i>P<math>\bar{1}</math></i> | B <sub>14</sub> O <sub>28</sub>                                   | 0D Isolated [B <sub>14</sub> O <sub>28</sub> ]                                      | 1.00               | /                    | 630 °C                     | [15]       |

|                                                                                                                 |                              |                                                                      |                                                                                                                             |      |                                             |            |              |
|-----------------------------------------------------------------------------------------------------------------|------------------------------|----------------------------------------------------------------------|-----------------------------------------------------------------------------------------------------------------------------|------|---------------------------------------------|------------|--------------|
| BaAlBO <sub>4</sub>                                                                                             | <i>P2<sub>1</sub>/c</i>      | B <sub>4</sub> O <sub>10</sub>                                       | 0D Isolated [B <sub>4</sub> O <sub>10</sub> ]                                                                               | 2.00 | [AlO <sub>4</sub> ]                         | 840 °C     | [16]         |
| Pb <sub>2.28</sub> Ba <sub>1.72</sub> B <sub>10</sub> O <sub>19</sub>                                           | <i>C2/c</i>                  | B <sub>10</sub> O <sub>24</sub>                                      | 3D Network                                                                                                                  | 0.40 | /                                           | 600 °C     | [17]         |
| K <sub>3</sub> SbBO <sub>13</sub>                                                                               | <i>C2/m</i>                  | B <sub>2</sub> O <sub>6</sub>                                        | 0D Isolated [B <sub>2</sub> O <sub>6</sub> ]                                                                                | 4.00 | /                                           | 1050 °C    | [18]         |
| Ba <sub>6</sub> Zn <sub>6</sub> (B <sub>3</sub> O <sub>6</sub> ) <sub>6</sub> (B <sub>6</sub> O <sub>12</sub> ) | <i>P<math>\bar{1}</math></i> | B <sub>3</sub> O <sub>6</sub> and B <sub>6</sub> O <sub>12</sub>     | 0D Isolated [B <sub>3</sub> O <sub>6</sub> ]<br>and [B <sub>6</sub> O <sub>12</sub> ]                                       | 0.50 | [ZnO <sub>4</sub> ]                         | 800/880 °C | [19]         |
| K <sub>3</sub> Al <sub>2</sub> B <sub>11</sub> O <sub>21</sub>                                                  | <i>P2<sub>1</sub>/c</i>      | B <sub>5</sub> O <sub>10</sub> and<br>B <sub>6</sub> O <sub>12</sub> | 1D <sup>1</sup> <sub>∞</sub> [B <sub>5</sub> O <sub>9</sub> ] Chain<br>and 0D Isolated<br>[B <sub>6</sub> O <sub>12</sub> ] | 0.45 | [AlO <sub>4</sub> ]                         | 600 °C     | This<br>Work |
| K <sub>3</sub> Al <sub>2</sub> MoB <sub>9</sub> O <sub>21</sub>                                                 | <i>P<math>\bar{1}</math></i> | B <sub>3</sub> O <sub>6</sub> and B <sub>6</sub> O <sub>12</sub>     | 0D Isolated [B <sub>3</sub> O <sub>6</sub> ]<br>and [B <sub>6</sub> O <sub>12</sub> ]                                       | 0.67 | [AlO <sub>4</sub> ] and [MoO <sub>4</sub> ] | 750 °C     | This<br>Work |
| Vacuum                                                                                                          |                              |                                                                      |                                                                                                                             |      |                                             |            |              |
| β-CsB <sub>9</sub> O <sub>14</sub>                                                                              | <i>P<math>\bar{1}</math></i> | B <sub>18</sub> O <sub>34</sub>                                      | Triple-layered                                                                                                              | 0.11 | /                                           | 400 °C     | [20]         |

<sup>a</sup> “A : B” indicates the ratio of the number of B atoms to cations.

**Table S6** Basic information of anhydrous borates containing two or more kinds of isolated B-O groups.

| NO. | Chemical Formula <sup>a</sup>                                                                                                                    | Space Group                                     | B-O Clusters                                                                             | A : B <sup>b</sup> | Covalent Polyhedron                | Ref  |
|-----|--------------------------------------------------------------------------------------------------------------------------------------------------|-------------------------------------------------|------------------------------------------------------------------------------------------|--------------------|------------------------------------|------|
| 1   | Ho <sub>31</sub> O <sub>27</sub> (BO <sub>3</sub> ) <sub>3</sub> (BO <sub>4</sub> ) <sub>6</sub>                                                 | $R\bar{3}$                                      | [BO <sub>3</sub> ]+[BO <sub>4</sub> ]                                                    | 3.44               | /                                  | [21] |
| 2   | Ni <sub>7</sub> U(BO <sub>3</sub> ) <sub>2</sub> (BO <sub>4</sub> ) <sub>2</sub> O <sub>2</sub>                                                  | <i>Pnnm</i>                                     | [BO <sub>3</sub> ]+[BO <sub>4</sub> ]                                                    | 2.00               | /                                  | [22] |
| 3   | Al <sub>8</sub> (BO <sub>3</sub> ) <sub>4</sub> (B <sub>2</sub> O <sub>5</sub> )F <sub>8</sub>                                                   | <i>P4<sub>2</sub>/nmc</i>                       | [BO <sub>3</sub> ]+[B <sub>2</sub> O <sub>5</sub> ]                                      | 1.33               | [AlO <sub>4</sub> F <sub>2</sub> ] | [23] |
| 4   | Ba <sub>3</sub> Zn(BO <sub>3</sub> )(B <sub>2</sub> O <sub>5</sub> )F                                                                            | <i>P2<sub>1</sub>/c</i>                         | [BO <sub>3</sub> ]+[B <sub>2</sub> O <sub>5</sub> ]                                      | 1.33               | [ZnO <sub>4</sub> ]                | [24] |
| 5   | Ba <sub>4</sub> Zn <sub>2</sub> (BO <sub>3</sub> ) <sub>2</sub> (B <sub>2</sub> O <sub>5</sub> )F <sub>2</sub>                                   | <i>C2/c</i>                                     | [BO <sub>3</sub> ]+[B <sub>2</sub> O <sub>5</sub> ]                                      | 1.50               | [ZnO <sub>4</sub> ]                | [24] |
| 6   | Ba <sub>2</sub> Sc <sub>2</sub> (BO <sub>3</sub> ) <sub>2</sub> (B <sub>2</sub> O <sub>5</sub> )                                                 | <i>C2/c</i>                                     | [BO <sub>3</sub> ]+[B <sub>2</sub> O <sub>5</sub> ]                                      | 1.00               | /                                  | [25] |
| 7   | Sr <sub>2</sub> Sc <sub>2</sub> (BO <sub>3</sub> ) <sub>2</sub> (B <sub>2</sub> O <sub>5</sub> )                                                 | $p\bar{1}$                                      | [BO <sub>3</sub> ]+[B <sub>2</sub> O <sub>5</sub> ]                                      | 1.00               | /                                  | [25] |
| 8   | Li <sub>3</sub> Ba <sub>4</sub> Sc <sub>3</sub> (BO <sub>3</sub> ) <sub>4</sub> (B <sub>2</sub> O <sub>5</sub> ) <sub>2</sub>                    | $p\bar{1}$                                      | [BO <sub>3</sub> ]+[B <sub>2</sub> O <sub>5</sub> ]                                      | 1.25               | /                                  | [26] |
| 9   | Ba <sub>5</sub> (BO <sub>3</sub> ) <sub>2</sub> (B <sub>2</sub> O <sub>5</sub> )                                                                 | <i>P2<sub>1</sub>2<sub>1</sub>2<sub>1</sub></i> | [BO <sub>3</sub> ]+[B <sub>2</sub> O <sub>5</sub> ]                                      | 1.25               | /                                  | [27] |
| 10  | Cu <sub>15</sub> (BO <sub>3</sub> ) <sub>6</sub> (B <sub>2</sub> O <sub>5</sub> ) <sub>2</sub> O <sub>2</sub>                                    | $p\bar{1}$                                      | [BO <sub>3</sub> ]+[B <sub>2</sub> O <sub>5</sub> ]                                      | 1.50               | /                                  | [28] |
| 11  | Cu <sub>9</sub> Ti <sub>2</sub> (BO <sub>3</sub> ) <sub>2</sub> (B <sub>2</sub> O <sub>5</sub> ) <sub>2</sub> O <sub>6</sub>                     | $p\bar{1}$                                      | [BO <sub>3</sub> ]+[B <sub>2</sub> O <sub>5</sub> ]                                      | 1.83               | [TiO <sub>6</sub> ]                | [29] |
| 12  | LiNa <sub>5</sub> Be <sub>12</sub> (BO <sub>3</sub> ) <sub>6</sub> (B <sub>2</sub> O <sub>5</sub> ) <sub>3</sub>                                 | <i>Pc</i>                                       | [BO <sub>3</sub> ]+[B <sub>2</sub> O <sub>5</sub> ]                                      | 1.50               | [BeO <sub>4</sub> ]                | [30] |
| 13  | Na <sub>2</sub> Be <sub>4</sub> (BO <sub>3</sub> ) <sub>2</sub> (B <sub>2</sub> O <sub>5</sub> )                                                 | <i>P1</i>                                       | [BO <sub>3</sub> ]+[B <sub>2</sub> O <sub>5</sub> ]                                      | 1.50               | [BeO <sub>4</sub> ]                | [30] |
| 14  | Pb <sub>8</sub> (BO <sub>3</sub> ) <sub>2</sub> (B <sub>2</sub> O <sub>5</sub> )O <sub>3</sub>                                                   | <i>Ama2</i>                                     | [BO <sub>3</sub> ]+[B <sub>2</sub> O <sub>5</sub> ]                                      | 2.00               | /                                  | [31] |
| 15  | Pb <sub>3</sub> Ba <sub>7</sub> (BO <sub>3</sub> ) <sub>5</sub> (B <sub>2</sub> O <sub>5</sub> )F                                                | <i>Pmn2<sub>1</sub></i>                         | [BO <sub>3</sub> ]+[B <sub>2</sub> O <sub>5</sub> ]                                      | 1.43               | /                                  | [32] |
| 16  | Sr <sub>2</sub> LiBe(BO <sub>3</sub> )(B <sub>2</sub> O <sub>5</sub> )                                                                           | <i>P2<sub>1</sub>/c</i>                         | [BO <sub>3</sub> ]+[B <sub>2</sub> O <sub>5</sub> ]                                      | 1.33               | [BeO <sub>4</sub> ]                | [33] |
| 17  | Cs <sub>3</sub> Zn <sub>6</sub> (BO <sub>3</sub> ) <sub>3</sub> (B <sub>3</sub> O <sub>6</sub> ) <sub>2</sub>                                    | <i>Cmc2<sub>1</sub></i>                         | [BO <sub>3</sub> ]+[B <sub>3</sub> O <sub>6</sub> ]                                      | 1.00               | [ZnO <sub>4</sub> ]                | [34] |
| 18  | K <sub>3</sub> Be <sub>6</sub> (BO <sub>3</sub> ) <sub>3</sub> (B <sub>3</sub> O <sub>6</sub> ) <sub>2</sub>                                     | <i>P2<sub>1</sub></i>                           | [BO <sub>3</sub> ]+[B <sub>3</sub> O <sub>6</sub> ]                                      | 1.00               | [BeO <sub>4</sub> ]                | [35] |
| 19  | Ca <sub>3</sub> Be <sub>6</sub> (BO <sub>3</sub> ) <sub>2</sub> (B <sub>3</sub> O <sub>10</sub> )F                                               | <i>P6<sub>3</sub>/m</i>                         | [BO <sub>3</sub> ]+[B <sub>3</sub> O <sub>10</sub> ]                                     | 1.80               | [BeO <sub>4</sub> ]                | [36] |
| 20  | Ca <sub>6</sub> Na <sub>8</sub> Li <sub>2</sub> Be <sub>8</sub> (BO <sub>3</sub> ) <sub>8</sub> (B <sub>12</sub> O <sub>24</sub> )F <sub>2</sub> | $R\bar{3}$                                      | [BO <sub>3</sub> ] + [B <sub>12</sub> O <sub>24</sub> ]                                  | 1.20               | [BeO <sub>4</sub> ]                | [37] |
| 21  | Cd <sub>6</sub> Na <sub>8</sub> Li <sub>2</sub> Be <sub>8</sub> (BO <sub>3</sub> ) <sub>8</sub> (B <sub>12</sub> O <sub>24</sub> )F <sub>2</sub> | $R\bar{3}$                                      | [BO <sub>3</sub> ] + [B <sub>12</sub> O <sub>24</sub> ]                                  | 1.20               | [BeO <sub>4</sub> ]                | [38] |
| 22  | Sr <sub>6</sub> Na <sub>8</sub> Li <sub>2</sub> Be <sub>8</sub> (BO <sub>3</sub> ) <sub>8</sub> (B <sub>12</sub> O <sub>24</sub> )F <sub>2</sub> | $R\bar{3}$                                      | [BO <sub>3</sub> ] + [B <sub>12</sub> O <sub>24</sub> ]                                  | 1.20               | [BeO <sub>4</sub> ]                | [38] |
| 23  | La <sub>4</sub> (BO <sub>3</sub> )(B <sub>3</sub> O <sub>8</sub> )F <sub>2</sub>                                                                 | <i>P2<sub>1</sub>/c</i>                         | [BO <sub>3</sub> ] + [B <sub>2</sub> O <sub>5</sub> ] + [B <sub>3</sub> O <sub>8</sub> ] | 1.00               | /                                  | [39] |

|    |                                                                                             |            |                                                                                |      |                                   |           |
|----|---------------------------------------------------------------------------------------------|------------|--------------------------------------------------------------------------------|------|-----------------------------------|-----------|
| 24 | $\text{Ba}_6\text{Al}_4(\text{BO}_3)_2(\text{B}_6\text{O}_{13})(\text{B}_6\text{O}_{14})$   | $P\bar{1}$ | $[\text{BO}_3] + [\text{B}_6\text{O}_{13}] + [\text{B}_6\text{O}_{14}]$        | 0.71 | $[\text{AlO}_4]$                  | [40]      |
| 25 | $\text{Ca}_{10}\text{Ge}_{16}(\text{BO}_4)_2(\text{B}_2\text{O}_7)_2\text{O}_{29}$          | $Pba2$     | $[\text{BO}_4] + [\text{B}_2\text{O}_7]$                                       | 4.33 | $[\text{GeO}_4] + [\text{GeO}_6]$ | [41]      |
| 26 | $\alpha\text{-Pb}_2\text{Ba}_4\text{Zn}_4(\text{B}_2\text{O}_5)(\text{B}_6\text{O}_{13})_2$ | $P1$       | $[\text{B}_2\text{O}_5] + [\text{B}_6\text{O}_{13}]$                           | 0.71 | $[\text{ZnO}_4]$                  | [42]      |
| 27 | $\beta\text{-Pb}_2\text{Ba}_4\text{Zn}_4(\text{B}_2\text{O}_5)(\text{B}_6\text{O}_{13})_2$  | $Cc$       | $[\text{B}_2\text{O}_5] + [\text{B}_6\text{O}_{13}]$                           | 0.71 | $[\text{ZnO}_4]$                  | [42]      |
| 28 | $\gamma\text{-Pb}_2\text{Ba}_4\text{Zn}_4(\text{B}_2\text{O}_5)(\text{B}_6\text{O}_{13})_2$ | $P3_2$     | $[\text{B}_2\text{O}_5] + [\text{B}_6\text{O}_{13}]$                           | 0.71 | $[\text{ZnO}_4]$                  | [42]      |
| 29 | $\text{Ba}_4\text{Na}_2\text{Zn}_4(\text{B}_3\text{O}_6)_2(\text{B}_{12}\text{O}_{24})$     | $P\bar{1}$ | $[\text{B}_3\text{O}_6] + [\text{B}_{12}\text{O}_{24}]$ (ES- $[\text{BO}_4]$ ) | 0.56 | $[\text{ZnO}_4]$                  | [14]      |
| 30 | $\text{Ba}_6\text{Zn}_6(\text{B}_3\text{O}_6)_6(\text{B}_6\text{O}_{12})$                   | $P\bar{1}$ | $[\text{B}_3\text{O}_6] + [\text{B}_6\text{O}_{12}]$ (ES- $[\text{BO}_4]$ )    | 0.50 | $[\text{ZnO}_4]$                  | [19]      |
| 31 | $\text{K}_3\text{Al}_2\text{MoO}_3(\text{B}_3\text{O}_6)(\text{B}_6\text{O}_{12})$          | $P\bar{1}$ | $[\text{B}_3\text{O}_6] + [\text{B}_6\text{O}_{12}]$ (ES- $[\text{BO}_4]$ )    | 0.67 | $[\text{AlO}_4] + [\text{MoO}_4]$ | This work |
| 32 | $\text{Rb}_{18}\text{Mg}_6(\text{B}_5\text{O}_{10})_3(\text{B}_7\text{O}_{14})_2\text{F}$   | $C2/c$     | $[\text{B}_5\text{O}_{10}] + [\text{B}_7\text{O}_{14}]$                        | 0.83 | /                                 | [43]      |

<sup>a</sup> The compounds on either side of the “/” sign are the same one in the chemical formula column.

<sup>b</sup> “A : B” indicates the ratio of the number of B atoms to cations.

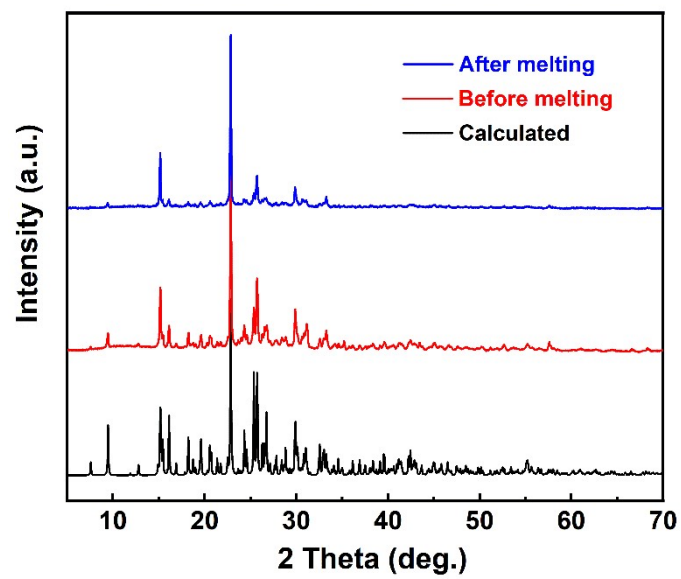

**Figure S1** Experimental and calculated powder X-ray diffraction patterns of  $K_3Al_2MoB_9O_{21}$



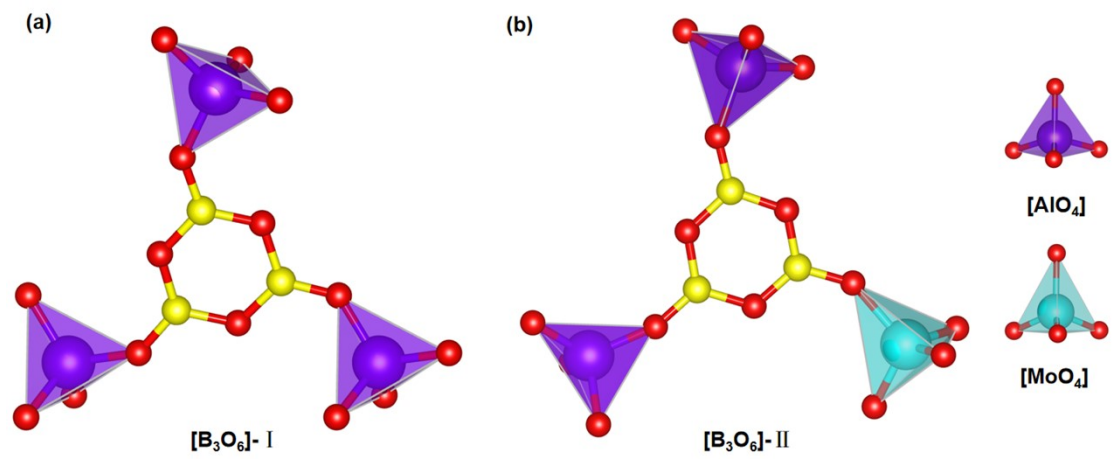

**Figure S2** The structures of (a)  $[B_3O_6]$ -I and (b)  $[B_3O_6]$ -II.

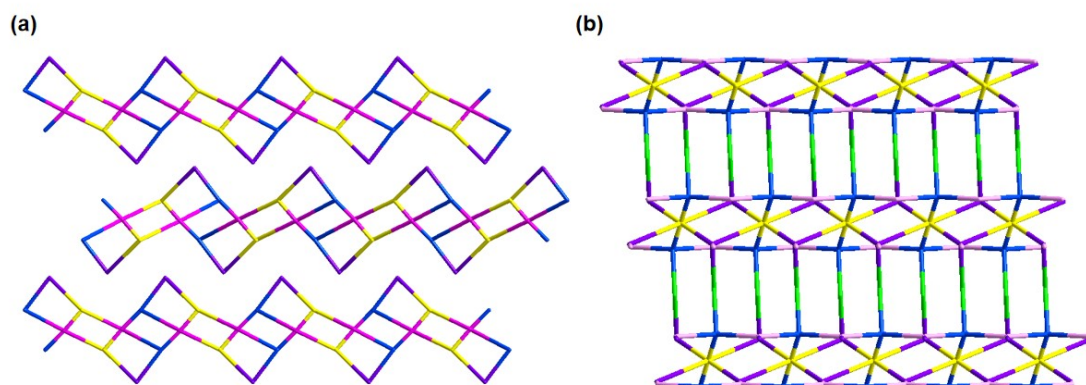

**Figure S3** The topological structure of (a)  $\text{K}_3\text{Al}_2\text{B}_{11}\text{O}_{21}$  where the  $[\text{Al}_2\text{B}_{11}\text{O}_{21}]$  are regarded as four-nodal net, (b)  $\text{K}_3\text{Al}_2\text{MoB}_9\text{O}_{21}$  where the  $[\text{Al}_2\text{B}_9\text{O}_{21}]$  are regarded as five-nodal net.

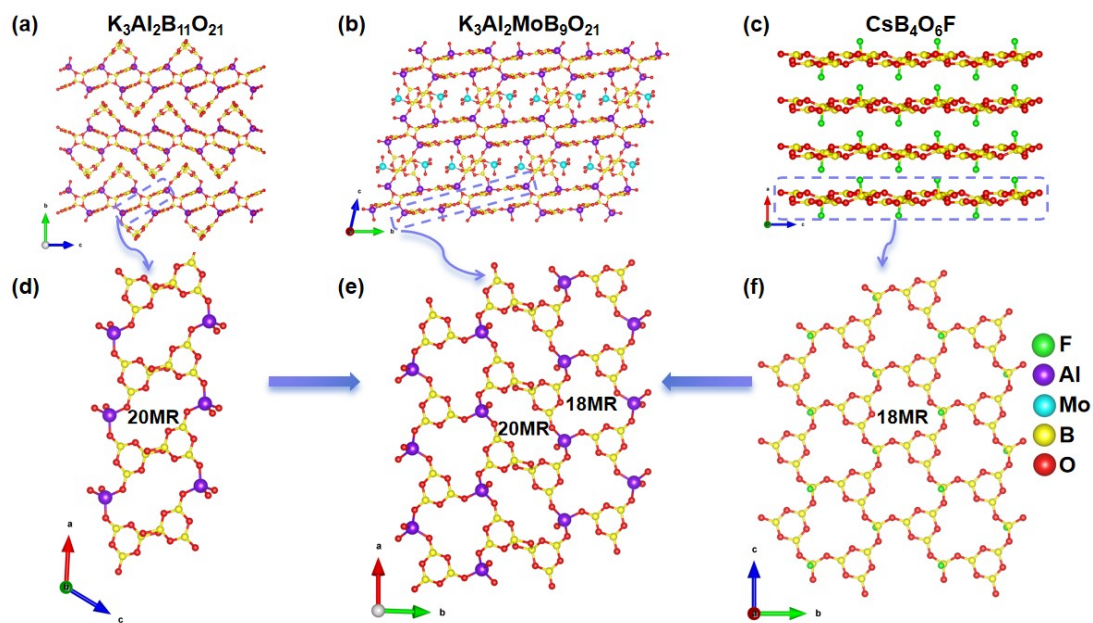

**Figure S4** The anionic framework of (a)  $K_3Al_2B_{11}O_{21}$ , (b)  $K_3Al_2MoB_9O_{21}$ , (c)  $CsB_4O_6F$  and multivariate rings in (d)  $K_3Al_2B_{11}O_{21}$ , (e)  $K_3Al_2MoB_9O_{21}$ , (f)  $CsB_4O_6F$ .

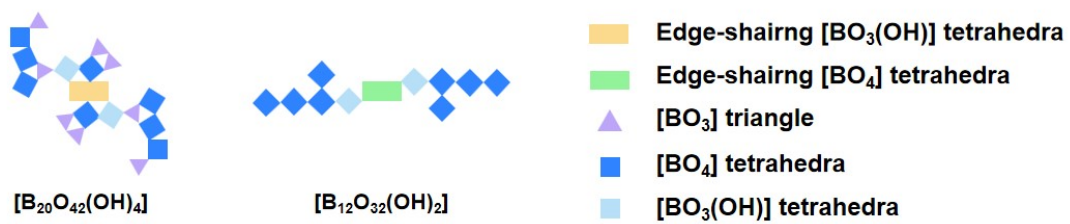

**Figure S5** The replacement node in FBB contains B-OH groups.

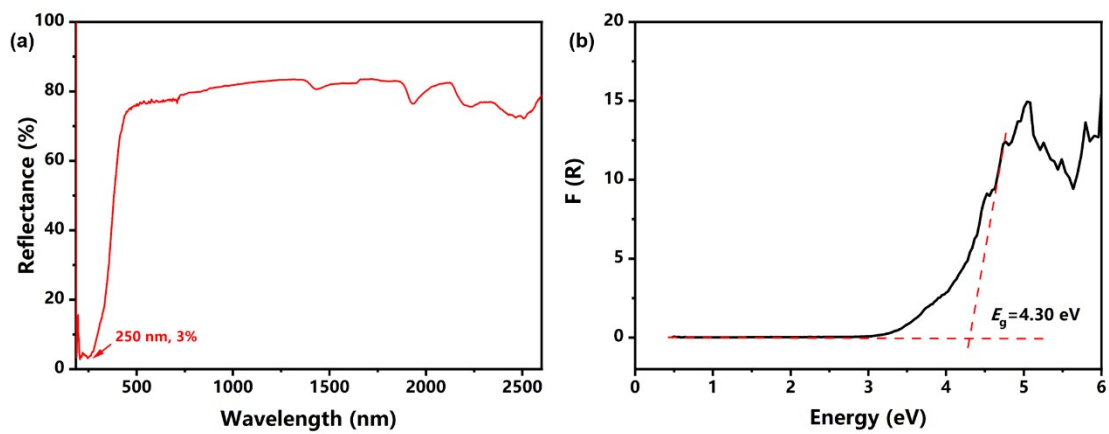

**Figure S6** (a) UV-Vis-NIR diffuse reflectance spectrum and (b) the experimental bandgap of  $K_3Al_2MoB_9O_{21}$ .

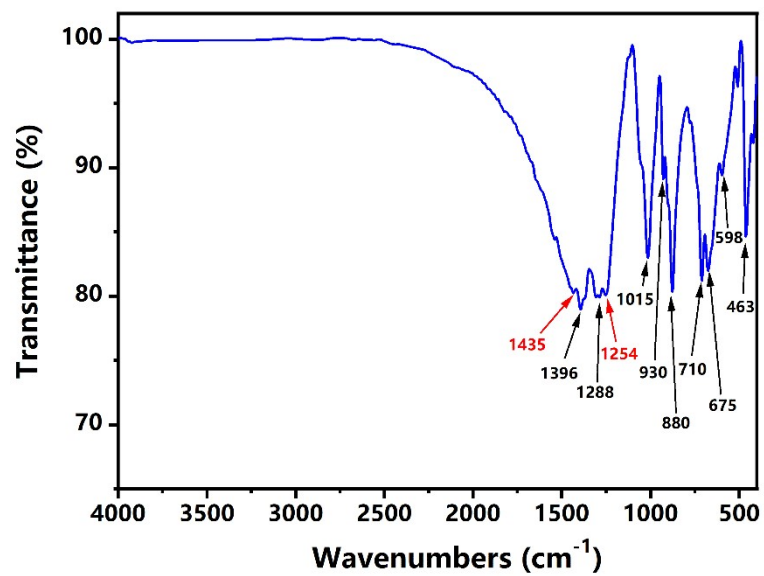

**Figure S7** Infrared spectrum of  $K_3Al_2MoB_9O_{21}$ .

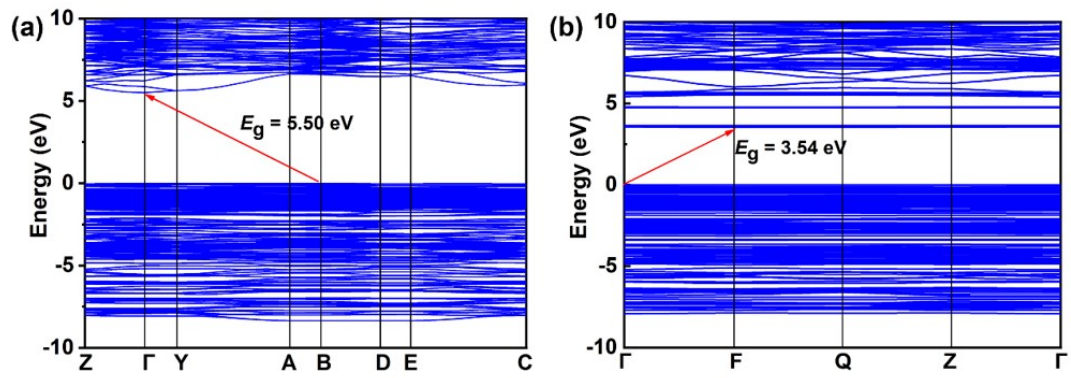

**Figure S8** Band structures of (a)  $K_3Al_2B_{11}O_{21}$ , (b)  $K_3Al_2MoB_9O_{21}$ .

## References

1. (a) H. Hubertz and V. Benjamin, *J. Am. Chem. Soc.*, 2002, **124**, 9376; (b) H. Huppertz, *Z. Naturforsch.*, 2003, **58**, 278-290.
2. (a) H. Emme and H. Huppertz, *Chem. Eur. J.*, 2003, **9**, 3623-3633; (b) H. Emme and H. Huppertz, *Acta. Crystallogr.*, 2005, **61**, i29-i31; (c) M. Schmitt and H. Huppertz, *Z. Naturforsch.*, 2017, **72**, 977-982.
3. B. Fuchs, G. Heymann, X. Wang, A. Tudi, L. Bayarjargal, R. Siegel, A. Schmutzler, J. Senker, M. Joachim, A. Saxer, Z. Yang, S. Pan and H. Huppertz, *Chem. Eur. J.*, 2020, **26**, 6851-6861.
4. (a) J. Knyrim, F. Roebner, S. Jakob, D. Johrendt, I. Kinski, R. Glaum and H. Huppertz, *Angew. Chem. Int. Ed.*, 2007, **46**, 9097-9100; (b) S. Neumair, R. Glaum and H. Huppertz, *Z. Naturforsch.*, 2009, **64b**, 883-890; (c) S. Neumair, R. Glaum and H. Huppertz, *Z. Naturforsch.*, 2010, **65b**, 1311-1317.
5. A. Pakhomova, B. Fuchs, L. Dubrovinsky, N. Dubrovinskaia and H. Huppertz, *Chem. Eur. J.*, 2021, **27**, 6007-6014.
6. S. Neumair, J. Knyrim, O. Oeckler, R. Glaum, R. Kaindl, R. Stalder and H. Huppertz, *Chem. Eur. J.*, 2010, **16**, 13659-13670.
7. S. Neumair, R. Kaindl and H. Huppertz, *J. Solid. State. Chem.*, 2012, **185**, 1-9.
8. (a) S. Neumair, S. Vanicek, R. Kaindl, D. Többens, C. Martineau, F. Taulelle, J. Senker and H. Huppertz, *Eur. J. Inorg. Chem.*, 2011, **42**, 4147-4152; (b) G. Sohr, D. Wilhelm, D. Vitzthum, M. Schmitt and H. Huppertz, *Z. Anorg. Allg. Chem.*, 2014, **640**, 2753-2758; (c) G. Sohr, S. Neumair and H. Huppertz, *Z. Naturforsch.*, 2012, **67b**, 1197-1204; (d) G. Sohr, L. Perfler and H. Huppertz, *Z. Naturforsch.*, 2014, **69b**, 1260-1268; (e) G. Sohr, S. Neumair, G. Heymann, K. Wurst, J. Günne and H. Huppertz, *Chem. Eur. J.*, 2014, **20**, 4316-4323.
9. G. Sohr, D. Többens, J. Günne and H. Huppertz, *Chem. Eur. J.*, 2014, **20**, 17059-17067.
10. L. Gorelova, A. Pakhomova, G. Aprilis, Y. Yin, D. Laniel, B. Winkler, S. Krivovichev, I. Pekov, N. Dubrovinskaia and L. Dubrovinsky, *Inorg. Chem. Front.*, 2022, **9**, 1735-1742.
11. T. Bekker, I. Podborodnikov, N. Sagatov, A. Shatskiy, S. Rashchenko, D. Sagatova, A. Davydov and K. Litasov, *Inorg. Chem.*, 2022, **61**, 2340-2350.
12. I. Jen, Y. Lee, C. Tsai and K. Lii, *Inorg. Chem.*, 2019, **58**, 4085-4088.
13. S. Jin, G. Cai, W. Wang, M. He, S. Wang and X. Chen, *Angew. Chem. Int. Ed.*, 2010, **49**, 4967-4970.
14. X. Chen, Y. Chen, C. Sun, X. Chang and W. Xiao, *J. Alloys. Compd.*, 2013, **568**, 60-67.
15. M. Mutailipu, M. Zhang, H. Li, X. Fan, Z. Yang, S. Jin, G. Wang and S. Pan, *Chem. Commun.*, 2019, **55**, 1295-1298.
16. F. Guo, J. Han, S. Cheng, S. Yu, Z. Yang and S. Pan, *Inorg. Chem.*, 2019, **58**, 8237-8244.
17. S. Guo, W. Zhang, R. Yang, M. Zhang, Z. Yang and S. Pan, *Inorg. Chem. Front.*, 2021, **8**, 3716-3722.



18. E. Quarez, E. Gautron, M. Paris, D. Gajan and J. Mevellec. *Inorg. Chem.*, 2021, **60**, 2406-2413.
19. (a) J. Han, K. Liu, L. Chen, F. Li, Z. Yang, F. Zhang, S. Pan and M. Mutailipu. *Chem. Eur. J.*, 2023, **29**, e202203000; (b) W. Xie, Z. Fang. and J. Mao, *Inorg. Chem.*, 2022, **61**, 18260-18266.
20. S. Han, C. Huang, A. Tudi, S. Hu, Z. Yang and S. Pan, *Chem. Eur. J.*, 2019, **25**, 11614-11619.
21. S. Hering, A. Haberer, R. Kaindl and H. Huppertz. *J. Solid State Sci.*, 2010, **12**, 1993-2002.
22. M. Gasperin. *Acta. Crystallogr.*, 1989. **C45**, 981-983.
23. Y. Wang, J. Han, J. Huang, Z. Yang and S. Pan, *Inorg. Chem.*, 2020, **59**, 810-817.
24. M. Mutailipu, X. Su, M. Zhang, Z. Yang and S. Pan, *Inorg. Chem. Front.*, 2017, **4**, 281-288.
25. P. Thompson, J. Huang, R. Smith and D. Keszler, *J. Solid State Chem.*, 1991, **95**, 126-135.
26. X. Meng, M. Xia and R. Li, *New. J. Chem.*, 2019, **43**, 11469-11472.
27. N. Furmanova, B. Maksimov, V. Molchanov, A. Kokh, N. Kononova and P. Fedorov, *Crystallogr. Rep.*, 2006, **51**, 219-224.
28. B. Behm, *Acta. Crystallogr.*, 1982, **B38**, 2781-2784.
29. J. Schaefer and K. Bluhm, *Z. Anorn. Alln. Chem.*, 1994, **620**, 1583-1588.
30. H. Huang, L. Liu, S. Jin, W. Yao, Y. Zhang and C. Chen, *J. Am. Chem. Soc.*, 2013, **135**, 18319-18322.
31. H. Yu, S. Pan, H. Wu, W. Zhao, F. Zhang, H. Li and Z. Yang, *J. Mater. Chem.*, 2012, **22**, 2105-2110.
32. W. Zhang, W. Jin, S. Han, Z. Yang and S. Pan, *Scripta. Mater.*, 2021, **194**, 113700.
33. N. Yu and N. Ye. *Acta. Crystallogr.*, 2012, **68**, i32-i32.
34. S. Zhao, J. Zhang, S. Zhang, Z. Sun, Z. Lin, Y. Wu, M. Hong and J. Luo, *Inorg. Chem.*, 2014, **53**, 2521-2527.
35. S. Wang, N. Ye, W. Li and D. Zhao, *J. Am. Chem. Soc.*, 2010, **132**, 8779-8786.
36. W. Yao, T. Xu, X. Jiang, H. Huang, X. Wang, Z. Lin and C. Chen, *Dalton Trans.*, 2014, **43**, 9998-10004.
37. S. Luo, W. Yao, P. Gong, J. Yao, Z. Lin and C. Chen, *Inorg. Chem.*, 2014, **53**, 8197-8199.
38. X. Wang, L. Liu, M. Xia, X. Wang and C. Chen, *Chinese J. Struct. Chem.*, 2015, **34**, 1617-1625.
39. A. Haberer, R. Kaindl, O. Oeckler and H. Huppertz, *J. Solid State Chem.*, 2010, **183**, 1970-1979.
40. X. Chen, J. Yue, X. Chang and W. Xiao. *J. Solid State Chem.*, 2017, **245**, 174-183.
41. X. Xu, C. Hu, F. Kong, J. Zhang and J. Mao, *Inorg. Chem.*, 2011, **50**, 8861-8868.
42. H. Yu, H. Wu, Q. Jing, Z. Yang, P. Halasyamani and S. Pan, *Chem. Mater.*, 2015, **27**, 4779-4788.
43. Z. Wang, M. Zhang, X. Su, S. Pan, Z. Yang, H. Zhang and L. Liu, *Chemistry*, 2015, **21**, 1414-1419.
